# Supplementary material for: Comprehensive analysis of ZNF692 as a potential biomarker associated with immune infiltration in a pan cancer analysis and validation in hepatocellular carcinoma
Source: publisher site journal article supplement (doi:10.18632/aging.205218), 2023-11-17
Supplement: Supplementary file [file aging-v15i22-205218-supplementary-material-SD1.pdf]

## SUPPLEMENTARY TABLE

Supplementary Table 1. Drug sensitivity analysis of ZNF692.

| Compound                                                   | Source    | Spearman.stat | Spearman.fdr | P-value     |
|------------------------------------------------------------|-----------|---------------|--------------|-------------|
| chlorobisoximatobismuth(iii)-dihydrochloride               | CellMiner | 0.653         | 0.000        | 1.54E-08    |
| chlorotris(chinoline-8-olato)titanium(iv)-trihydrochloride | CellMiner | 0.653         | 0.000        | 1.58E-08    |
| tetrakis(8-chinolineolato)titanium(iv)-tetrahydrochloride  | CellMiner | 0.606         | 0.001        | 2.90E-07    |
| benzoxazole, 2-[(1-methyl-4-nitro-1H-imidazol-5-yl)thio]-  | CellMiner | 0.605         | 0.001        | 3.12E-07    |
| antineoplastic-637578                                      | CellMiner | 0.603         | 0.003        | 3.36796E-07 |
| 1-naphthalenecarboxamide, n,n'-1,8-(octanediyl)bis-        | CellMiner | -0.497        | 0.002        | <0.05       |
| N-cyclohexyl-4-((1-phenyl-1H-pyrazolo[3,4-d]pyrimidin-4... | CellMiner | -0.508        | 0.003        | 3.39E-05    |
| 4-piperidinone, 3,5-dimethyl-1-nitroso-2,6-diphenyl-       | CellMiner | -0.525        | 0.001        | 1.68E-05    |
| (E)-5-chloro-3-((6-(4-chlorophenyl)-2-cyclopropylimidaz... | CellMiner | -0.544        | 0.001        | 6.97E-06    |
| 1,3-diphenyl-4-(3-phenyl-4,5-dihydro-1H-pyrazol-5-yl)-1... | CellMiner | -0.575        | 0.001        | 1.54E-06    |
